# Supplementary material for: Wingless Directly Represses DPP Morphogen Expression via an Armadillo/TCF/Brinker Complex
Source: PLOS journal article supplement (doi:10.1371/journal.pone.0000142), 2007-01-03
Supplement: S2 (10.1371/journal.pone.0000142.s002) [file journal.pone.0000142.s002]

Table 1 Descriptions, values, and references of parameters used.

| Symbol                   | Description                                                                                                                                                                       | Value and unit                                           | Justification                                                                                                                                     |
|--------------------------|-----------------------------------------------------------------------------------------------------------------------------------------------------------------------------------|----------------------------------------------------------|---------------------------------------------------------------------------------------------------------------------------------------------------|
| $l_+$                    | DNA-protein association rate                                                                                                                                                      | $2.22 \times 10^{-2} \mu M^{-1} \text{ sec}^{-1}$        | Preliminary data from SPR analysis                                                                                                                |
| $l_-$                    | DNA-protein dissociation rate                                                                                                                                                     | $4.11 \times 10^{-5} \text{ sec}^{-1}$                   | Preliminary data from SPR analysis                                                                                                                |
| $k_+$                    | protein-protein association rate                                                                                                                                                  | $1.01 \times 10^{-1} \mu M^{-1} \text{ sec}^{-1}$        | [58]                                                                                                                                              |
| $k_-$                    | protein-protein dissociation rate                                                                                                                                                 | $8.47 \times 10^{-4} \text{ sec}^{-1}$                   | [58]                                                                                                                                              |
| $V_A$                    | production rate of ARM                                                                                                                                                            | $10^{-7} - 10^{-1} \mu M \text{ sec}^{-1}$               | Covers wide range of production where minimum corresponds to endogenous expression and maximum corresponds to over-expression via Gal4 activation |
| $V_T$                    | Production rate of TCF                                                                                                                                                            | $10^{-5} - 10^{-3} \mu M \text{ sec}^{-1}$               |                                                                                                                                                   |
| $V_{Bmax}$               | Maximum production rate of BRK                                                                                                                                                    | $10^{-4} - 10^{-1} \mu M \text{ sec}^{-1}$               |                                                                                                                                                   |
| $V_{Bmin}$               | Minimum production rate of BRK                                                                                                                                                    | $10^{-6} - 10^{-3} \mu M \text{ sec}^{-1}$               |                                                                                                                                                   |
| $K_{Amax}$<br>$K_{Amin}$ | maximum and minimum degradation rates of ARM                                                                                                                                      | $10^{-2} \text{ sec}^{-1}$<br>$10^{-4} \text{ sec}^{-1}$ | Covers wide range where maximum degradation results in no accumulation of Arm (no WG signaling) and minimum degradation mimics WG signaling.      |
| $K_{degB}$               | Degradation rate of BRK                                                                                                                                                           | $10^{-3} \text{ sec}^{-1}$                               | Rate of degradation computed from production rate and initial value of BRK to achieve steady state                                                |
| $\gamma_A$<br>$\gamma_B$ | EC <sub>50</sub> , effective concentration at 50%<br>(1) for feedback of <i>wg</i> activation on degradation of A<br>(2) for feedback of <i>dpp</i> repression on production of B | $10^{-2} - 10^{-4} \mu M$                                | Values of gammas are chosen so that maximal feedback occurs at the halfway point between the maximum and minimum response values.                 |
| $m$ and $n$              | Hill coefficients                                                                                                                                                                 | 1                                                        | Hill coefficient of one is commonly used to allow a plausible rate of transition from maximum to minimum values e.g. [59,60]                      |
| $(e_1 e_2)_0$            | total DNA binding sites for repression                                                                                                                                            | $10^{-3} \mu M$                                          | Value corresponds to 2 sites /cell. Cell volume from [61]                                                                                         |
| $(e_3)_0$                | total DNA binding sites for activation                                                                                                                                            | $10^{-3} \mu M$                                          | Value corresponds to 2 sites /cell. Cell volume from [61]                                                                                         |
| $f_1$ and $f_2$          | cooperative association and dissociation factors                                                                                                                                  | 10 and 1                                                 | Reflects cooperative interactions occurring 10 fold faster than non cooperative reactions                                                         |

Legend: A brief description of each of the parameters used in modeling is given along with range of values used and references that validate those values.
